# Supplementary material for: Molecular insights into the enzymatic diversity of flavin‐trafficking protein (Ftp; formerly ApbE) in flavoprotein biogenesis in the bacterial periplasm
Source: PubMed Central journal article supplement (PMC4767422; doi:10.1002/mbo3.306), 2015-12-02

**Figure S1. PROMALS3D (1) structure-based sequence alignment of NqrC and RnfG flavinylation target proteins.** The first line in each block shows conservation indices for positions with a conservation index above 5. Each representative sequence has a magenta name and is colored according to PSIPRED (2) secondary structure predictions (red: alpha-helix, blue: beta-strand). A representative sequence and the immediate sequences below it with black names, if there are any, form a closely related group. The consensus amino acid sequence (Consensus\_aa) and consensus predicted secondary structures (Consensus\_ss) are labeled. Consensus predicted secondary structure symbols: alpha-helix: h; beta-strand: e. Functionally important conserved residues are highlighted in yellow and labeled above the sequence alignment with the following codes: residues that contact the FMN in the NqrC\_So structure are labeled with an asterisk (\*); the putative catalytically important lysine residue is labeled with a dagger (†); and the conserved hydrogen-bonding residue in the loop preceding the threonine target of flavinylation is labeled with an ampersand (&).

**Figure S2. Flavin site geometry of NqrC\_So structure.** Ligplot+ (3) schematic of residues involved in interactions with the phosphoester-threonyl-FMN residue. The bonds of the FMN modification are purple, the bonds of protein side chains are brown, carbon atoms are black spheres, nitrogens are blue, oxygens are red, and sulfurs are yellow. Green dotted lines represent hydrogen-bonding interactions with interatomic distances labeled. Hydrophobic interactions of protein residues with the FMN ligand are represented as red arcs with the name of the residue labeled. Corresponding atoms of both ligand and protein residues involved in hydrophobic contacts are shown with a halo of short red lines radiating from the atom sphere.

---

1. **Pei J, Kim BH, Grishin NV.** 2008. PROMALS3D: a tool for multiple protein sequence and structure alignments. *Nucleic Acids Res* **36**:2295-2300.
2. **Jones DT.** 1999. Protein secondary structure prediction based on position-specific scoring matrices. *J Mol Biol* **292**:195-202.
3. **Laskowski RA, Swindells MB.** 2011. LigPlot+: multiple ligand-protein interaction diagrams for drug discovery. *J Chem Inf Model* **51**:2778-2786.

Figure S1.

Conservation: 8

RnfG\_Tm 1 M-----K D I L K T G L I L M V F T A I S G L F L G L 24

RnfG\_Tm coords. -----

NqrC\_Pd 1 M A K Y K C K V C G Y V H E G N K A P D T C P V C S A P A S E F E E I K E E G A A K K G I N R D S N V Y T V V Y A A V M V V L V A V V L A F 70

NqrC\_Pd coords. -----

NqrC\_Vc 1 M A S -----N N D S I K K T L F V V I A L S L V C S I I V S A 28

NqrC\_Vc coords. -----

NqrC\_Vh 1 M A S -----N N D S I K K T L G V V I G L S L V C S I I V S T 28

NqrC\_Hd 1 M A K -----F N K D S V S G T L T V V V L L S L I C S L I V A S 29

NqrC\_So 1 M V F -----K K D T V V G T M I F T I T L C L L C S F M I T G 28

NqrC\_So coords. -----

NqrC\_Td 1 M -----K Q M I K L A L T L S A Y A V I A C L A L A A 24

RnfG\_Vc 1 M L -----T A I R K N G L I L A V F A C V S T G L V A L 25

RnfG\_Ec 1 M L -----K T I R K H G I T L A L F A A G S T G L T A A 25

NqrC\_Ef 1 M K -----V N K -----F V K G F 10

Consensus aa: **M**.....

Consensus ss: hhhhhhhhhhhhhhhhhhhhh

Conservation: 5 5 5

RnfG\_Tm 25 V Y V G V K G K I Q E A D N A A K L S A I K F V L K D P L T G D Y L V D E K E ---- I E E I V K K T -----G I 73

RnfG\_Tm coords. 37 -----D N A A K L S A I K F V L K D P L T G D Y L V D E K E ---- I E E I V K K T -----G I 73

NqrC\_Pd 71 T S Q S L R S F Q K Q N E D N D K R Q Q I L R S I N V N V S S ---S E A E T K Y N E L I K E A F L V N E N G E K V E --G D ---A F A T 132

NqrC\_Pd coords. 73 --Q S L R S F Q K Q N E D N D K R Q Q I L R S I N V N V S S ---S E A E T K Y N E L I K E A F L V N E N G E K V E --G D ---A F A T 132

NqrC\_Vc 29 A A V G L R D K Q K E N A A L D K Q S K I L Q V A G I E A K G S --K Q I V E L F N K S I E P R L V D F N T G D F V E --G D ---A A N Y 91

NqrC\_Vc coords. 33 ----L R -----D K Q S K I L Q V A G I E A K G S --K Q I V E L F N K S I E P R L V D F N T G D F V E --G D ---A A N Y 91

NqrC\_Vh 29 A A V G L R D K Q K A N A V L D K Q S K I V E V A G I E A D G ---K K V P E L F A E Y I E P R L V D F K T G D F V E T A G D G S T A A N Y 95

NqrC\_Hd 30 A A V L L K P T Q D I Q K Q L D K Q K N I L Q A A G L M H E N ---T N V Q E T Y A K F I E P K I V D L A T G D Y V E --D ---V A N F 90

NqrC\_So 29 T A G V L K E R K L A K K R D E L Q R Y V L M A A D V N L G Q G --N E F R D I F A K S V K P L L I N L D T G K V D S --D A N --V L D F 92

NqrC\_So coords. 32 ---S L K E R K L A K K R D E L Q R Y V L M A A D V N L G Q G --N E F R D I F A K S V K P L L I N L D T G K V D S --D A N --V L D F 92

NqrC\_Td 25 V Y N F T A P R I A E V K I E K T N R A L K A V F P E A E D F ---K E I S ----- 59

RnfG\_Vc 26 T Y A L T A E Q I Q Q Q E Q K Q L L Q V L N Q V I P H K Y H D ---N P L A -----Q A C T L V ----- 66

RnfG\_Ec 26 I N Q M T K T T I A E Q A S L Q Q K A L F D Q V L P A E R Y N ---N A L A -----Q S C Y L V ----- 66

NqrC\_Ef 11 A A I A L S S L -----V L A A C G A D K K D -----N T T N S --S S ---A A S S 40

Consensus aa: ....hp..b.....pb.p.l..hhs...p....pph.....sh

Consensus ss: hhhhhhhhhhhhhhhhhhhhhhhhhhhhhhh hhhh hh

Post-translational protein flavinylation in bacteria

```

Conservation:          6          55 5          6 5          5
RnfG_Tm               74 ETVV-----LKE----YKEG-----VVLGPLYEFVTKD-GRNAYVLSG-YAPGFGGNVTVVACFIKTE 125
RnfG_Tm coords.      74 ETVV-----LKE----YKEG-----VVLGPLYEFVTKD-GRNAYVLSG-YAPGF-GNVTVVACFIKTE 125
NqrC_Pd              133 DVVKAA-----TEHQYPVFVANVDG--QPKYIMAL-HGAGLWGLPLWGYISVDS- 178
NqrC_Pd coords.     133 DVVKAA-----TEHQYPVFVANVDG--QPKYIMAL-HGAGLWGLPLWGYISVDS- 178
NqrC_Vc              92 DQRKAAKEASESIKLTAEQDKAKIQRRANVGVVYLVKDGDKD-KTSKVILPV-HGNGLWSMMYAFVAVETD- 158
NqrC_Vc coords.     92 DQRKAAKEASESIKLTAEQDKAKIQRRANVGVVYLVKDGDKD-KTSKVILPV-HGNGLWSMMYAFVAVETD- 158
NqrC_Vh              96 DQRKAAKDPAESIKLTAEEDKAKILRRANTGIVYLVKSGD-EVSKVIIPV-HGTGLWSMMYAFVAVETD- 162
NqrC_Hd              91 DAKAFAKDPATSVAIKPEDDKANIRMRAKYAEVYLVKDEMGQTTQVVLPM-YGNGLWSMMYGFVAVQPD- 158
NqrC_So              93 DERMAAINPETSSTPK--KDIAKIKTRANDARVFKVFDSDSGKLSSVVVPF-YGKLWSMIYGYVAVEPD- 158
NqrC_So coords.     93 DERMAAINPETSSTPK--KDIAKIKTRANDARVFKVFDSDSGKLSSVVVPF-YGKLWSMIYGYVAVEPD- 158
NqrC_Td              60 -----AEIPEGLNKTTFLNAYTAIKNG-KTVGLTITA-KGPTYAS-ATILIAMDLN- 107
RnfG_Vc              67 -----NDDKLGTAKTMHAYLAQRDG-QPTAIAIETIAPDGYNGEIKLIVGIANN- 114
RnfG_Ec              67 -----TAP-ELGKGEHRVYIAKQDD-KPVAAVLEATAPDGYSGAIQLLVGADFN- 113
NqrC_Ef              41 ETKK-----STESSAPAKKVAGGDLKDGTYKLEE-KNEKNGYRAVFEMTVKD-- 86
Consensus aa:      -.....s.....p.....h@.h...s.p.s.hhl....s.sh.t.hh.hhth...s.
Consensus ss:      hh          eeeeeee   eeeeeeee e   eeeeeeee

```

```

Conservation:          65 5 676667 5          5 6
RnfG_Tm              126 DGFMLNSVRVIDYSQETPGLGAKIG-----EESIQRRFFVPVPEGLKN----- 168
RnfG_Tm coords.     126 DGFMLNSVRVIDYS-----QESIQRRFFVPVPEGLKN----- 168
NqrC_Pd              179 -KNTIYGADFSHQG-ETPGLGAEIS-----KPVFSNEFKGKIFMSGEF----- 220
NqrC_Pd coords.     179 -KNTIYGADFSHQG-ETPGLGAEIS-----KPVFSNEFKGKIFMSGEF----- 220
NqrC_Vc              159 -GNTVSGLTYYEQG-ETPGLGGEVE-----NPAWRAQWVGKLFDENHK----- 200
NqrC_Vc coords.     159 -GNTVSGLTYYEQG-ETPGLGGEVE-----NPAWRAQWVGKLFDENHK----- 200
NqrC_Vh              163 -GDTVSGLTYYEQG-ETPGLGGEVE-----NPAWRAQWVGKLFDENHK----- 204
NqrC_Hd              159 -ANTVNGITYYEQG-ETAGLGGEIA-----NPNWQKSFVGKLFNANNE----- 200
NqrC_So              159 -FNTIKGVVYEHG-ETPGIGDFVT-----DPHWLSLWKGKQLFDDKGK----- 200
NqrC_So coords.     159 -FNTIKGVVYEHG-ETPGIGDFVT-----DPHWLSLWKGKQLFDDKGK----- 200
NqrC_Td              108 --KTIRKIEFLELT-DTPSLGSKAA-----DEPFAGQFNGKALDSAF----- 146
RnfG_Vc              115 -G-TVLGVRVLAHQ-ETPGLGDKIDLR-----ISNWVLGFNGQQVTADNQ----- 156
RnfG_Ec              114 -G-TVLGTRVTEHH-ETPGLGDKIELR-----LSDWITHFAGKKISGADD----- 155
NqrC_Ef              87 -G-KITESKYDNIN-ADGSKTEDTKYESMKAKSGVGPKEYIKQLNDSFVKAQSASGVEVVTGATHSSE 153
Consensus aa:      ...hl..hp.p.s.-TstlGsch.....@..p@.sp.l.s.....
Consensus ss:      eeeeeeeee   hhhhhh

```

Post-translational protein flavinylation in bacteria

|                      |     |                                           |                                        |     |
|----------------------|-----|-------------------------------------------|----------------------------------------|-----|
| Conservation:        |     |                                           | †                                      |     |
|                      |     |                                           | 7                                      |     |
| RnfG_Tm              | 169 | -----GLRV                                 | <b>KDAG</b>                            | 177 |
| RnfG_Tm coords.      | 169 | -----GLRV                                 | <b>KDAG</b>                            | 177 |
| NqrC_Pd              | 221 | -----KSV                                  | <b>AVVK</b>                            | 227 |
| NqrC_Pd coords.      | 221 | -----KSV                                  | <b>AVVK</b>                            | 227 |
| NqrC_Vc              | 201 | -----PAI                                  | <b>KIVK</b> -G                         | 208 |
| NqrC_Vc coords.      | 201 | -----PAI                                  | <b>KIVK</b> -G                         | 208 |
| NqrC_Vh              | 205 | -----PAI                                  | <b>KIVK</b> -G                         | 212 |
| NqrC_Hd              | 201 | -----VAL                                  | <b>TIGK</b> -G                         | 208 |
| NqrC_So              | 201 | -----FAM                                  | <b>RLVK</b> -G                         | 208 |
| NqrC_So coords.      | 201 | -----FAM                                  | <b>RLVK</b> -G                         | 208 |
| NqrC_Td              |     | -----                                     |                                        |     |
| RnfG_Vc              | 157 | -----DDW                                  | <b>KVRK</b>                            | 163 |
| RnfG_Ec              | 156 | -----AHW                                  | <b>AVKK</b>                            | 162 |
| NqrC_Ef              | 154 | SFQNYAQQLIQAAQAGNTDTIEIDNGATLKDGTYSLKEKND | SNGYHTTFSMTV <b>K</b> DGKVTESNYDNVNADG | 223 |
| <u>Consensus aa:</u> |     | .....                                     | sh.l <b>sK</b> .....                   |     |
| <u>Consensus ss:</u> |     |                                           | eeee                                   |     |

|                      |     |                         |                                                  |         |      |
|----------------------|-----|-------------------------|--------------------------------------------------|---------|------|
| Conservation:        |     |                         | &                                                | *****   |      |
|                      |     |                         | 6                                                | 5979    | 7 57 |
| RnfG_Tm              | 178 | -----LPKGSPEELKKQGIVKVS | <b>DVMTGATIT</b> PRAVV <b>TAL</b>                |         | 212  |
| RnfG_Tm coords.      | 178 | -----LPKGSPEELKKQGIVKVS | <b>DV</b> -----TPRAVV <b>TAL</b>                 |         | 212  |
| NqrC_Pd              | 228 | -----PGKS---VAGQ---DYV  | <b>DGISGGTIT</b> SKGV <b>DEML</b>                |         | 255  |
| NqrC_Pd coords.      | 228 | -----PGKS---VAGQ---DYV  | <b>DGISGGTIT</b> SKGV <b>DEML</b>                |         | 255  |
| NqrC_Vc              | 209 | -----GAP---QGSE---HGVD  | <b>DGLSGATLTS</b> NGVQ <b>NTF</b>                |         | 235  |
| NqrC_Vc coords.      | 209 | -----GAP---QGSE---HGVD  | <b>DGLSGATLTS</b> NGVQ <b>NTF</b>                |         | 235  |
| NqrC_Vh              | 213 | -----GAP---EGSE---HGVD  | <b>DGLSGATLT</b> GNGVQ <b>GTF</b>                |         | 239  |
| NqrC_Hd              | 209 | -----AS---ADKE---HGVD   | <b>DGLSGATLT</b> SKGV <b>DNSF</b>                |         | 234  |
| NqrC_So              | 209 | -----GVK---EGDI---HGVD  | <b>DAVSGATMT</b> GRGVQ <b>RAM</b>                |         | 235  |
| NqrC_So coords.      | 209 | -----GVK---EGDI---HGVD  | <b>DAVSGATMT</b> GRGVQ <b>RAM</b>                |         | 235  |
| NqrC_Td              | 147 | -----EVN---ADIN         | <b>AIGGATIT</b> SRGV <b>AAIV</b>                 |         | 169  |
| RnfG_Vc              | 164 | -----DG---GQF           | <b>DQFTGATIT</b> PRAVV <b>LAV</b>                |         | 185  |
| RnfG_Ec              | 163 | -----DG---GDF           | <b>DQFTGATIT</b> PRAVV <b>NAV</b>                |         | 184  |
| NqrC_Ef              | 224 | KSKKDDTEYESKMKDVGAVGPK  | KEYIETLNKEFVKAMGEE---DGSP---AGVEVVTGATHSTHSFINYA |         | 286  |
| <u>Consensus aa:</u> |     | .....                   | h-sho <b>GAThTs+tv</b> ..hh                      |         |      |
| <u>Consensus ss:</u> |     |                         | eeee                                             | hhhhhhh |      |

|                      |     |                                 |     |
|----------------------|-----|---------------------------------|-----|
| Conservation:        |     | 5                               |     |
| RnfG_Tm              | 213 | NLMYR--YLEEVSK-----             | 224 |
| RnfG_Tm coords.      | 213 | NLMYR--YLEEVSK-----             | 224 |
| NqrC_Pd              | 256 | FNSLS--GYVKFLTSQN-----          | 270 |
| NqrC_Pd coords.      | 256 | FNSLS--GYVKFLTSQN-----          | 270 |
| NqrC_Vc              | 236 | DFWLGDMGFGPFLTKVRDGGGLN-----    | 257 |
| NqrC_Vc coords.      | 236 | DFWLGDMGFGPFLTKVRDGGGLN-----    | 257 |
| NqrC_Vh              | 240 | DFWLGDMGFGPFLAKVRDGGGLN-----    | 261 |
| NqrC_Hd              | 235 | KYWFGTNGFGPYLAKFKATAGAN-----    | 257 |
| NqrC_So              | 236 | EFWFGVEGFQTFNQLKASADQGELGGAK--- | 264 |
| NqrC_So coords.      | 226 | EFWFGVEGFQTFNQLKAS-----         | 253 |
| NqrC_Td              | 170 | KDASV--TAIEYMAKNNLEEGK-----     | 189 |
| RnfG_Vc              | 186 | KKAVE--YVNQHQQQLHNQPNPCEGQ----- | 209 |
| RnfG_Ec              | 185 | KRAGL--YAQTLPAQLSQLPACGE-----   | 206 |
| NqrC_Ef              | 287 | QQLVN--AAEKGDT-----TEIVVDNIVTK  | 309 |
| <u>Consensus aa:</u> |     | p.hh....h..h..p.p.....          |     |
| <u>Consensus ss:</u> |     | hhhhh hhhhhhhhhh                |     |

Figure S2.

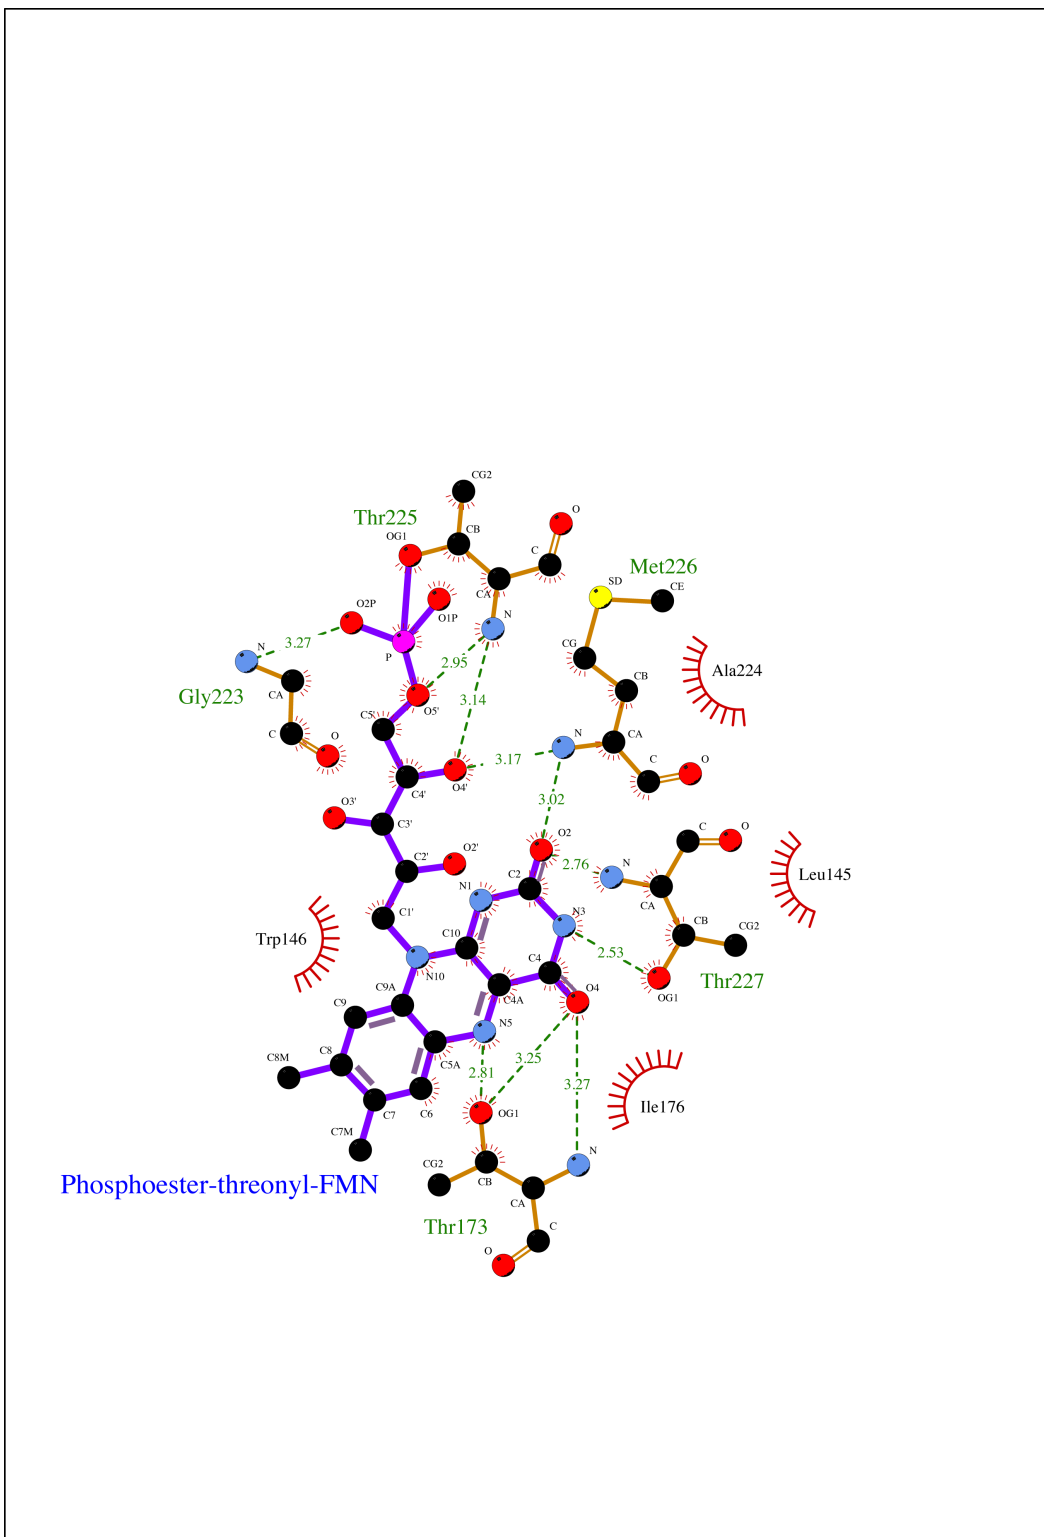

Supplement: MBO3-5-021-s001.pdf [file MBO3-5-021-s001.pdf]
